# Supplementary material for: Optically active uniform potassium and lithium rare earth fluoride nanocrystals derived from metal trifluroacetate precursors
Source: Royal Society of Chemistry journal article supplement (doi:10.1039/b909145a), 2009-01-01
Supplement: b909145a.pdf [file b909145a.pdf]

Electronic Supplementary Information (ESI) for

**Optically Active Uniform Potassium and Lithium Rare Earth Fluoride Nanocrystals Derived from Metal Trifluoroacetate Precursors**

Ya-Ping Du, Ya-Wen Zhang\*, Ling-Dong Sun, and Chun-Hua Yan\*

*Beijing National Laboratory for Molecular Sciences, State Key Lab of Rare Earth Materials Chemistry and Applications & PKU-HKU Joint Lab in Rare Earth Materials and Bioinorganic Chemistry, Peking University, Beijing 100871, China*

**Table S1.** Crystal Structure, Morphology, and Size of the As-Synthesized KREF<sub>4</sub> (RE = La to Gd, Y) and LiREF<sub>4</sub> (RE = Tb to Lu, Y) Nanocrystals *via* the Co-thermolysis of 1 mmol K(CF<sub>3</sub>COO) or Li(CF<sub>3</sub>COO) and 1 mmol RE(CF<sub>3</sub>COO)<sub>3</sub> in Oleic Acid (OA)/Oleylamine (OM)/1-Octadecene (ODE) (40 mmol).

|                    | OA:OM:ODE | T [°C] | t [min] | structure    | morphology                    | size [nm] <sup>[a]</sup>                 |
|--------------------|-----------|--------|---------|--------------|-------------------------------|------------------------------------------|
| KLaF <sub>4</sub>  | 1:1:2     | 280    | 60      | cubic        | wormlike wire                 | (8.2±0.5) ×<br>(23–100)                  |
|                    | 1:1:2     | 300    | 60      | cubic        | cube                          | (9.4±0.9)                                |
|                    | 1:1:2     | 300    | 60      | cubic        | polygon                       | (9.5±0.5)                                |
| KCeF <sub>4</sub>  | 1:1:2     | 260    | 60      | cubic        | wormlike wire                 | (7.8±0.4) ×<br>(30–120)                  |
|                    | 1:1:2     | 280    | 60      | cubic        | cube                          | (10.4±1.1)                               |
|                    | 1:1:2     | 300    | 60      | cubic        | cube (predominate)<br>and rod | (15.4±1.3)<br>(12.4±0.8) ×<br>(33.1±1.8) |
|                    | 1:1:2     | 320    | 60      | cubic        | polygon                       | (13.5±0.5)                               |
| KPrF <sub>4</sub>  | 1:1:2     | 280    | 60      | cubic        | polyhedron                    | (18.2±3.6)                               |
| KNdF <sub>4</sub>  | 1:1:2     | 280    | 60      | cubic        | polyhedron                    | (16.4±4.2)                               |
| KSmF <sub>4</sub>  | 1:1:2     | 280    | 60      | cubic        | polyhedron                    | (18.9±3.8)                               |
| KEuF <sub>4</sub>  | 1:1:2     | 280    | 60      | cubic        | polyhedron                    | (19.5±4.1)                               |
| KGdF <sub>4</sub>  | 1:1:2     | 300    | 60      | cubic        | polyhedron                    | (21.2±6.1)                               |
| KYF <sub>4</sub>   | 1:1:2     | 300    | 30      | cubic        | polyhedron                    | (13.2–25.9)                              |
| LiTbF <sub>4</sub> | 1:0:1     | 330    | 30      | tetragonal   | rhombic plate                 | (27.1±2.4) ×<br>(25.8±4.3)               |
| LiDyF <sub>4</sub> | 1:0:1     | 330    | 30      | tetragonal   | rhombic plate                 | (55.1±2.1) ×<br>(49.9±3.7)               |
| LiHoF <sub>4</sub> | 1:0:1     | 280    | 60      | tetragonal   | rhombic plate                 | (53.1±3.4) ×<br>(49.8±2.3)               |
| LiErF <sub>4</sub> | 1:0:1     | 320    | 60      | tetragonal   | rhombic plate                 | (51.1±2.3) ×<br>(50.9±3.0)               |
| LiErF <sub>4</sub> | 1:0:1     | 300    | 60      | cubic (ErOF) | polyhedron                    | (23.2±0.4)                               |
| LiTmF <sub>4</sub> | 1:0:1     | 320    | 60      | tetragonal   | rhombic plate                 | (56.1±2.3) ×<br>(54.9±3.0)               |
| LiYbF <sub>4</sub> | 1:0:1     | 320    | 60      | tetragonal   | rhombic plate                 | (40.3±5.9) ×<br>(36.9±4.3)               |
| LiLuF <sub>4</sub> | 1:0:1     | 280    | 60      | tetragonal   | rhombic plate                 | (91.5±2.3) ×<br>(89.3±3.2)               |
| LiLuF <sub>4</sub> | 1:0:1     | 300    | 60      | tetragonal   | rhombic plate                 | (41.6±11.8) ×<br>(39.8±9.9)              |
| LiYF <sub>4</sub>  | 1:0:1     | 330    | 8       | tetragonal   | rhombic plate                 | (29.2±3.9) ×<br>(23.2±3.0)               |

<sup>[a]</sup> The statistic standard deviation from at least 50 particles.

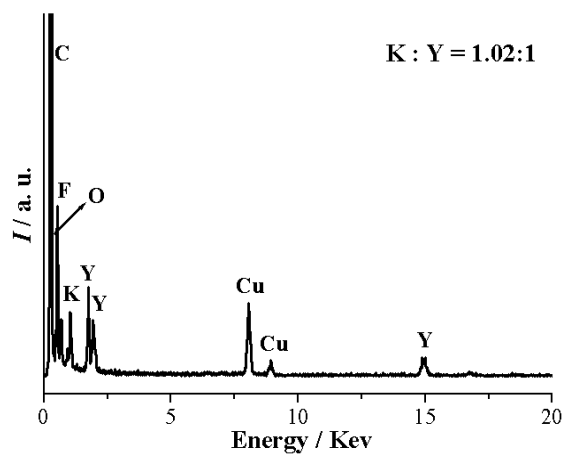

**Fig. S1.** Energy-dispersive X-ray analysis (EDAX) spectrum of  $\text{KYF}_4$  nanopolyhedra, from which the atomic ratio of K:Y was determined as 1.02:1.

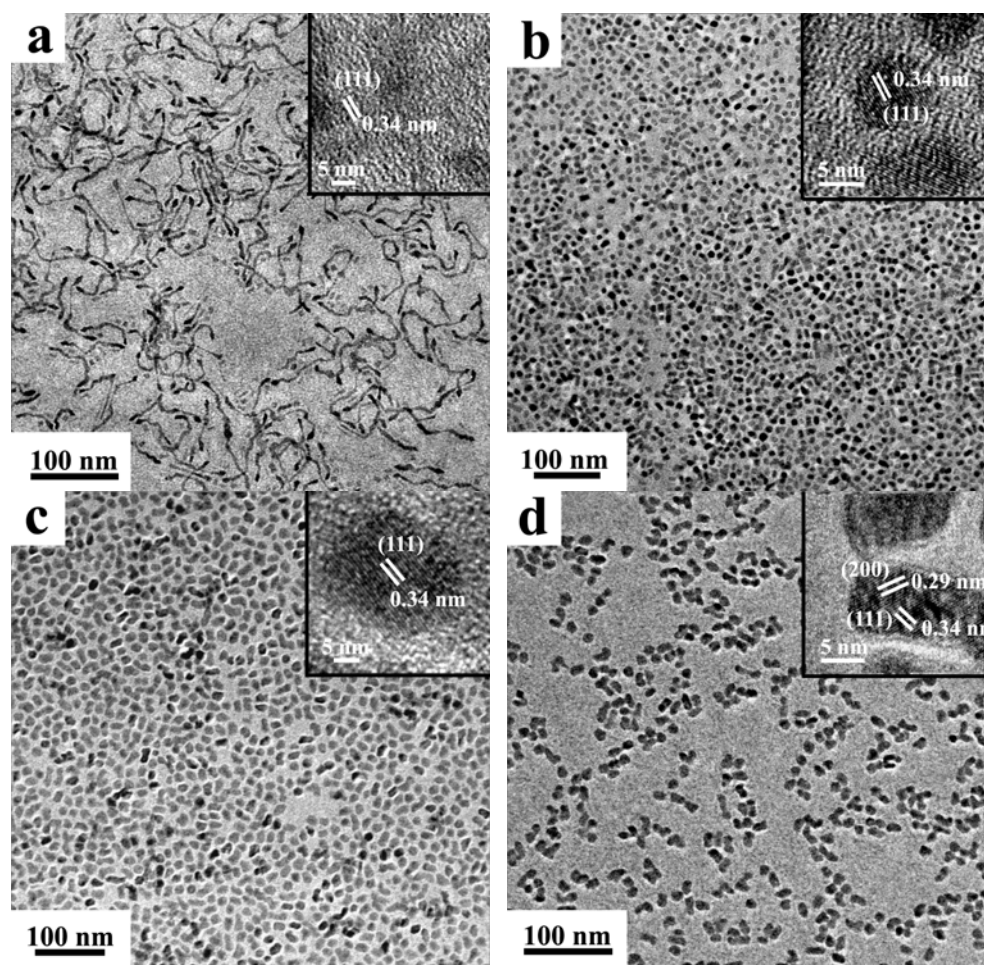

**Fig. S2.** TEM images of (a)  $\text{KCeF}_4$  wormlike nanowires, (b)  $\text{KNdF}_4$  (c)  $\text{KSmF}_4$ , and (d)  $\text{KGdF}_4$  nanopolyhedra.

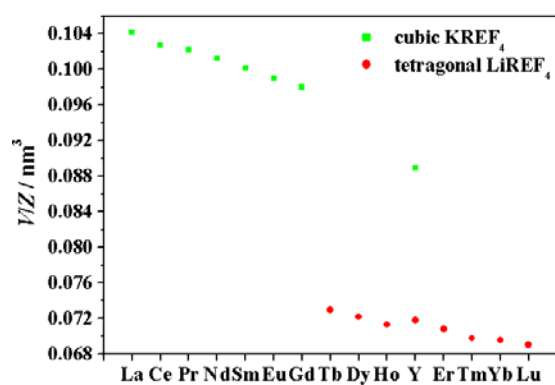

**Fig. S3.** Plots of the measured lattice volume over the number of KREF<sub>4</sub> and LiREF<sub>4</sub> molecules ( $Z$ ) in one unit cell against the rare-earth series.

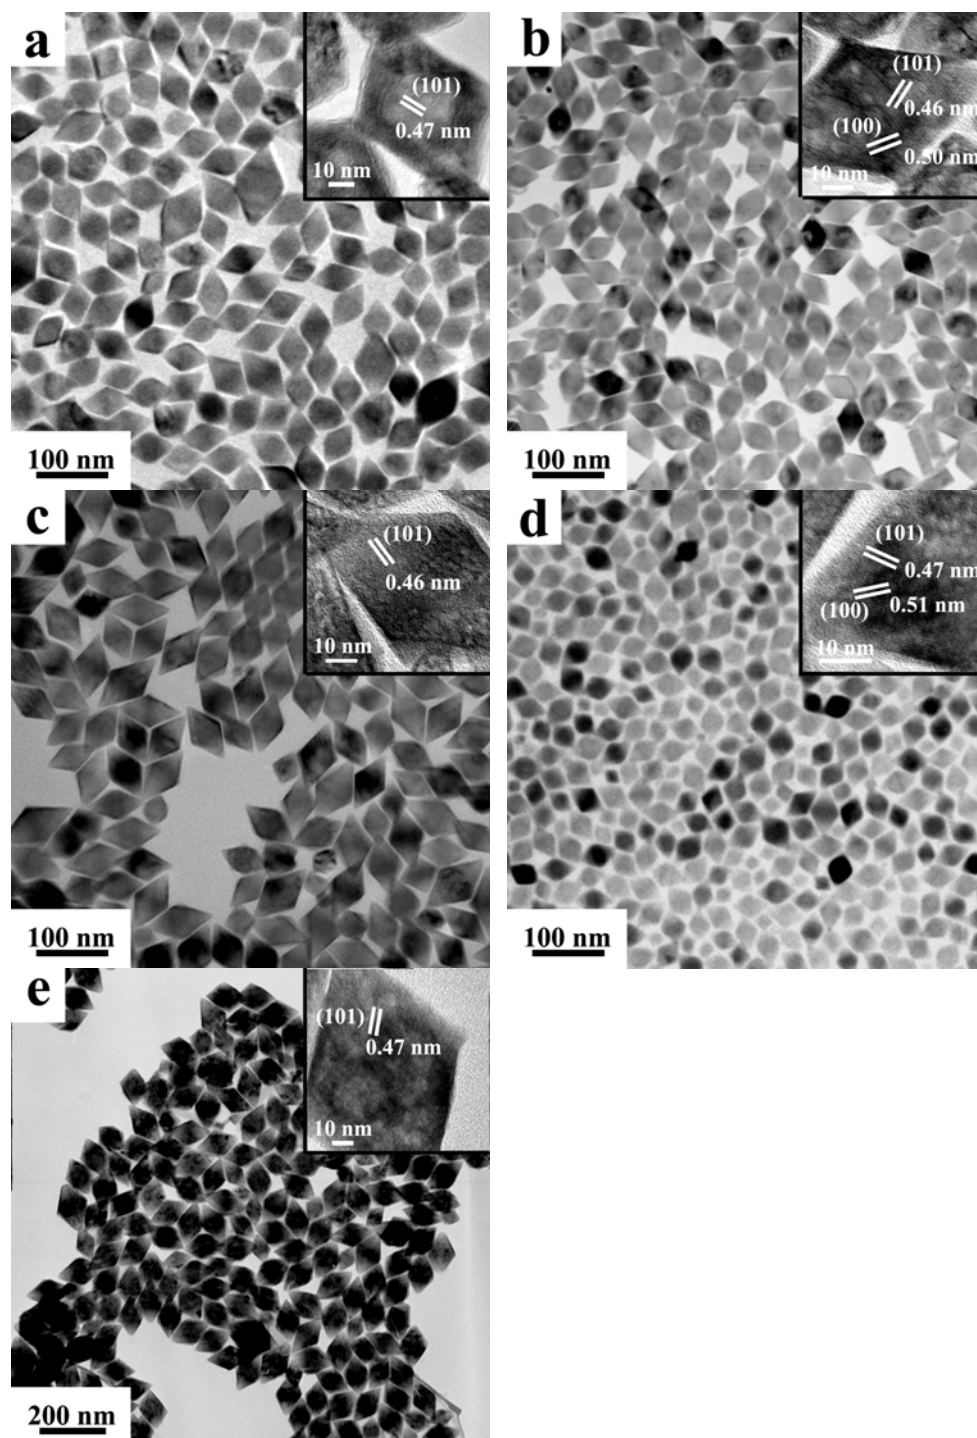

**Fig. S4.** TEM images of (a) LiDyF<sub>4</sub>, (b) LiHoF<sub>4</sub>, (c) LiTmF<sub>4</sub>, (d) LiYbF<sub>4</sub>, and (e) LiLuF<sub>4</sub> nanoplates.

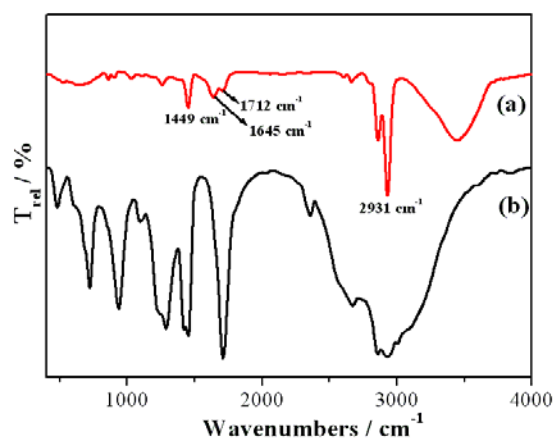

**Fig. S5.** FTIR spectra of (a) surfactants bound to LiYF<sub>4</sub> nanocrystals and (b) oleic acid.

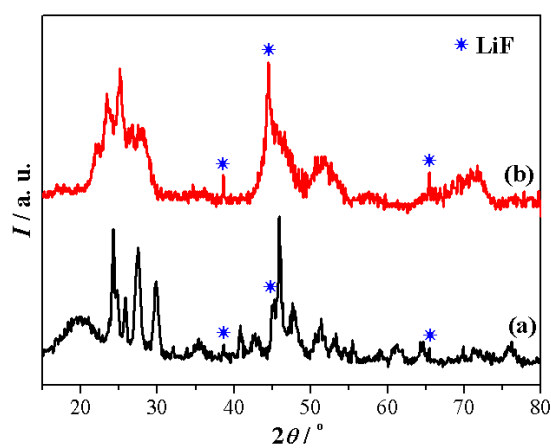

**Fig. S6.** XRD patterns of (a) LiLuF<sub>4</sub> and (b) LiYF<sub>4</sub> nanocrystals synthesized from co-thermolysis of 1 mmol Li(CF<sub>3</sub>COO) and 1 mmol Lu(CF<sub>3</sub>COO)<sub>3</sub> or Y(CF<sub>3</sub>COO)<sub>3</sub> under OA/OM/ODE (4:1:5) at 280 °C for 60 min.

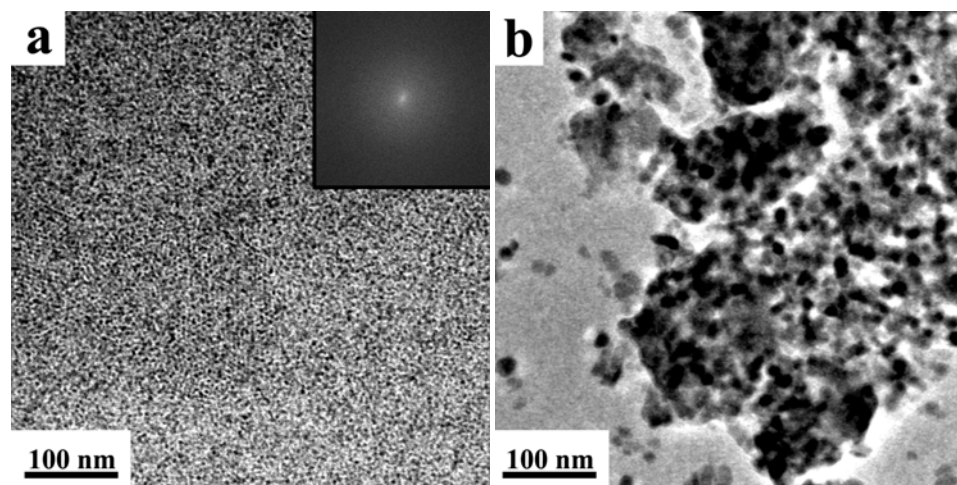

**Fig. S7.** TEM images of  $\text{KYF}_4$  nanocrystals obtained from the co-thermolysis of 1 mmol  $\text{K}(\text{CF}_3\text{COO})$  and 1 mmol  $\text{Y}(\text{CF}_3\text{COO})_3$  in OA/OM/ODE (1:1:2) for 30 min at different reaction temperatures: (a) 300 °C and (b) 330 °C.

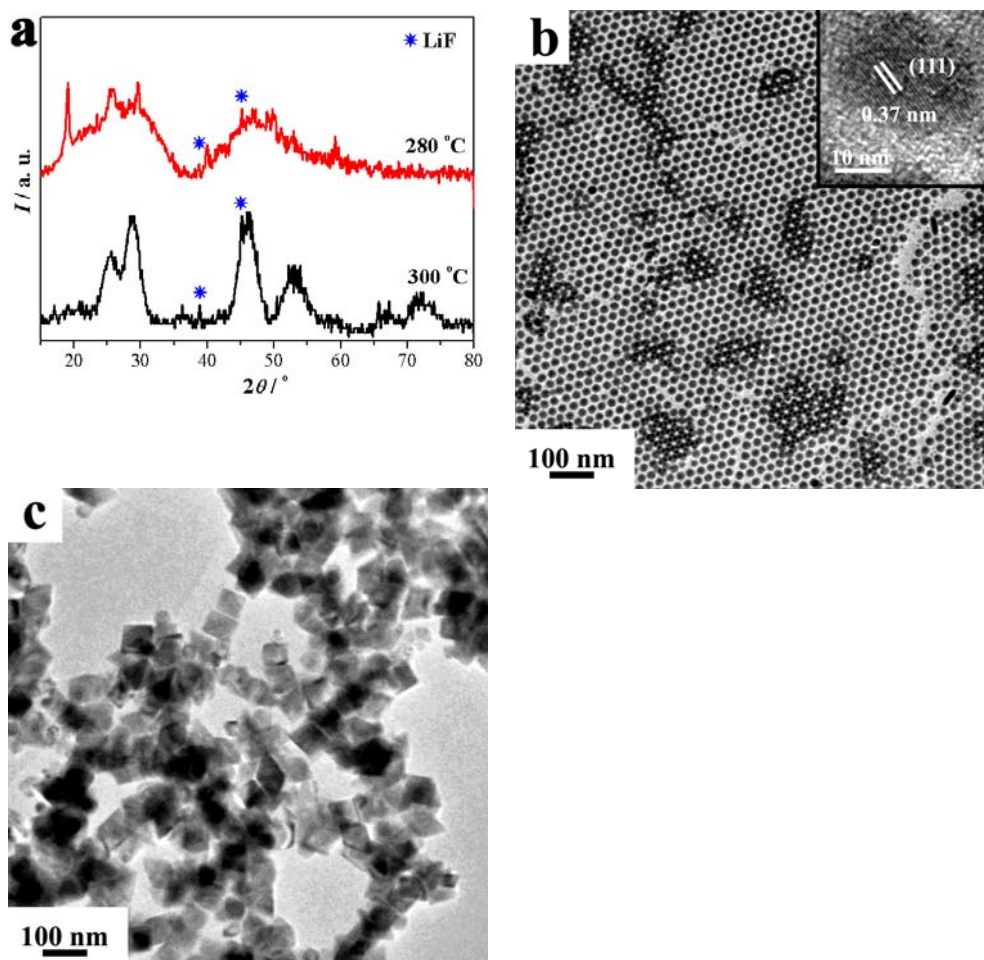

**Fig. S8.** XRD patterns of LiErF<sub>4</sub> nanocrystals obtained from the thermolysis of 1 mmol Li(CF<sub>3</sub>COO) and 1 mmol Er(CF<sub>3</sub>COO)<sub>3</sub> in OA/ODE (1:1) for 60 min at different reaction temperatures. TEM images of LiErF<sub>4</sub> nanocrystals obtained from the thermolysis of 1 mmol Li(CF<sub>3</sub>COO) and 1 mmol Er(CF<sub>3</sub>COO)<sub>3</sub> in OA/ODE (1:1) for 60 min at different reaction temperatures: (b) 300 °C and (c) 330 °C .



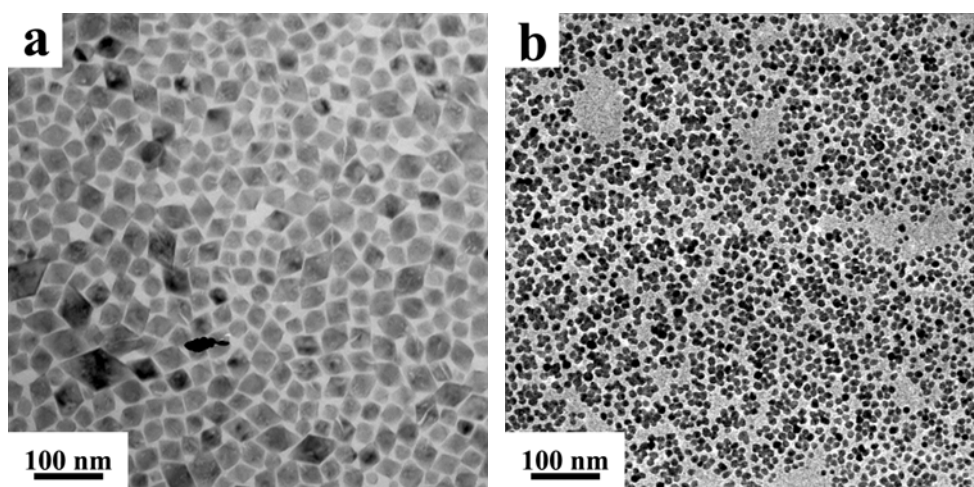

**Fig. S9.** TEM images of  $\text{LiLuF}_4$  nanocrystals obtained from the co-thermolysis of 1 mmol  $\text{Li}(\text{CF}_3\text{COO})$  and 1 mmol  $\text{Lu}(\text{CF}_3\text{COO})_3$  in OA/ODE (1:1) for 60 min at different reaction temperatures: (a) 300 °C and (b) 320 °C.

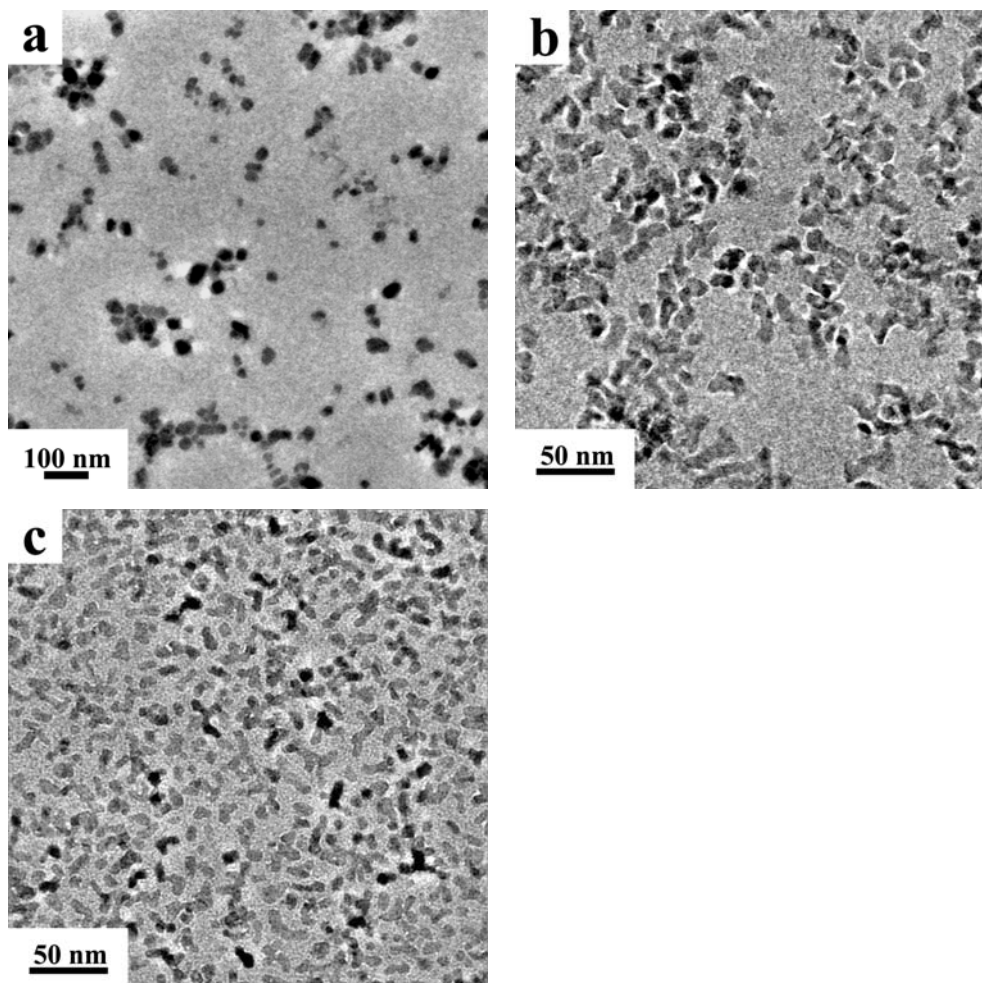

**Fig. S10.** TEM images of  $\text{KYF}_4$  nanocrystals obtained from the thermolysis of 1 mmol  $\text{K}(\text{CF}_3\text{COO})$  and 1 mmol  $\text{Y}(\text{CF}_3\text{COO})_3$  in OA/OM/ODE (1:1:2) at  $300^\circ\text{C}$  for different reaction times: (a) 15 min, (b) 45 min, and (c) 60 min.

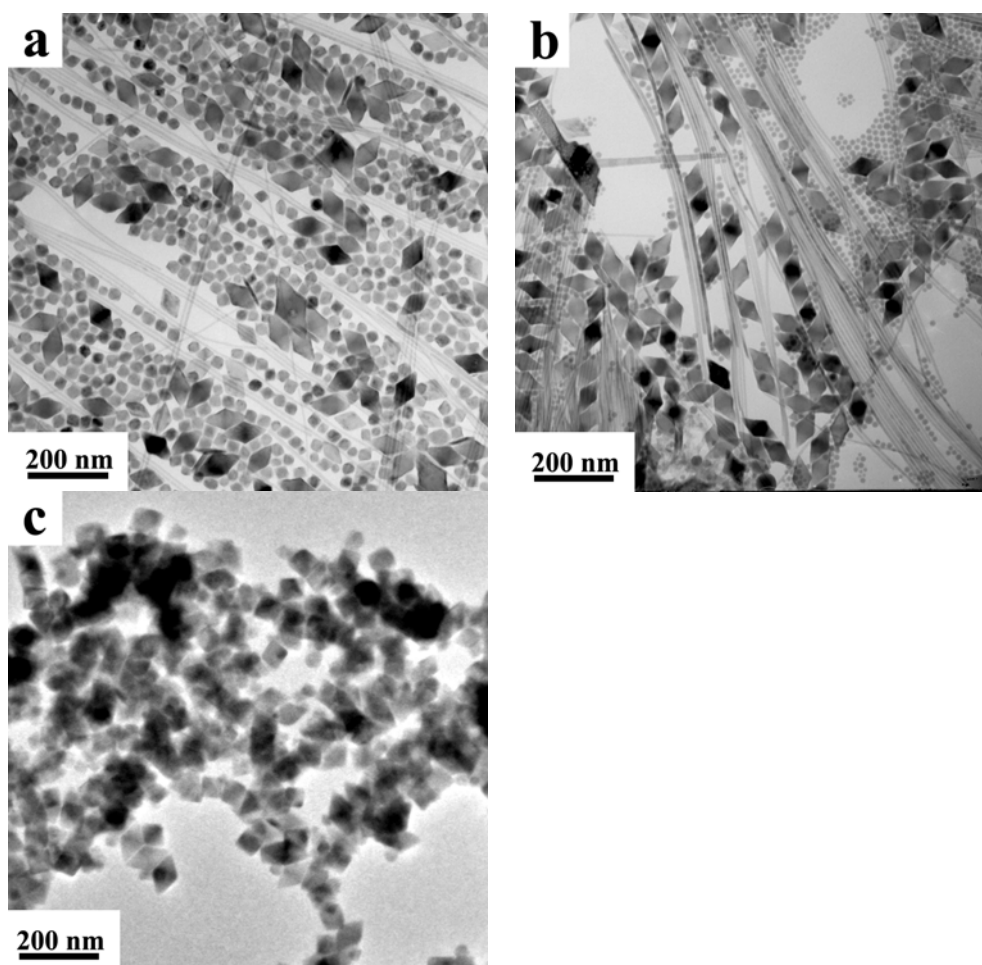

**Fig. S11.** TEM images of  $\text{LiErF}_4$  nanocrystals obtained from the thermolysis of 1 mmol  $\text{Li}(\text{CF}_3\text{COO})$  and 1 mmol  $\text{Er}(\text{CF}_3\text{COO})_3$  in OA/ODE (1:1) at 330 °C for different reaction times: (a) 15 min, (b) 30 min, and (c) 120 min.
